# Supplementary material for: RAM-PGK: Prediction of Lysine Phosphoglycerylation Based on Residue Adjacency Matrix
Source: MDPI journal article supplement (doi:10.3390/genes11121524), 2020-12-20
Supplement: s1 [file s1]

Supplementary File S1

# RAM-PGK: Prediction of Lysine Phosphoglycerylation based on Residue Adjacency Matrix

Abel Avitesh Chandra <sup>1,†,\*</sup>, Alok Sharma <sup>1,2,3,†,\*</sup>, Abdollah Dehzangi <sup>4,5</sup> and Tatushiko Tsunoda <sup>2,6,7</sup>

<sup>1</sup> School of Engineering & Physics, University of the South Pacific, Fiji

<sup>2</sup> Laboratory for Medical Science Mathematics, RIKEN Center for Integrative Medical Sciences, Yokohama 230-0045, Japan

<sup>3</sup> Institute for Integrated and Intelligent Systems, Griffith University, Brisbane, QLD 4111, Australia

<sup>4</sup> Department of Computer Science, Rutgers University, Camden, NJ 08102, USA

<sup>5</sup> Center for Computational and Integrative Biology, Rutgers University, Camden, NJ 08102, USA

<sup>6</sup> Laboratory for Medical Science Mathematics, Department of Biological Sciences, Graduate School of Science, The University of Tokyo, Tokyo 113-0033, Japan

<sup>7</sup> Department of Medical Science Mathematics, Medical Research Institute, Tokyo Medical and Dental University, Tokyo 113-8510, Japan

\* Correspondence: abelavit@gmail.com (A.A.C.); alok.sharma@griffith.edu.au (A.S.)

† These authors contributed equally to this work.

**Supplement Material.** Comparison of the time needed to carry out feature construction and 6-fold cross-validation of each of the methods on Matlab program. The comparison was carried out on a machine with 24 CPUs (Intel(R) Xeon(R) CPU E5 – 2650 v4 @ 2.20GHz) and 125.8 GB memory. PSI-BLAST tool was run using 16 CPUs while the other programs was run on single CPU.

| Method            | Feature Construction time                                   | 6-Fold Cross-Validation time | Total Time (seconds) |
|-------------------|-------------------------------------------------------------|------------------------------|----------------------|
| CKSAAP_PhoglySite | 402.53 sec                                                  | 83.82 sec                    | <b>486.35</b>        |
| iPGK-PseAAC       | 6.91 sec                                                    | 8.69 sec                     | <b>15.60</b>         |
| Bigram-PGK        | PSI-BLAST + Matlab Program<br>5078.39 + 15.71 = 5094.10 sec | 2.12 sec                     | <b>5096.22</b>       |
| RAM-PGK           | 48.52 sec                                                   | 0.49 sec                     | <b>49.01</b>         |
